# Supplementary material for: Promoting solution-processed CdTe nanocrystal solar cells via rationally controlled copper doping
Source: Royal Society of Chemistry journal article supplement (doi:10.1039/d4tc02669a), 2024-01-01
Supplement: d4tc02669a1.pdf [file d4tc02669a1.pdf]

## Promoting solution-processed CdTe nanocrystal solar cells by rationally controlled copper doping

Qichuan Huang <sup>a</sup>, Songwei Liu <sup>a</sup>, Chenbo Min <sup>a</sup>, Zheng Zhou <sup>a</sup>, Donghuan Qin <sup>\*a,c</sup>, Dan Wang <sup>a,c</sup>, Wei Xu <sup>a,c</sup> and Lintao Hou <sup>\*b</sup>

<sup>a</sup> School of Materials Science and Engineering, South China University of Technology, Guangzhou, 510640, China;

<sup>b</sup> Siyuan Laboratory, Guangzhou Key Laboratory of Vacuum Coating Technologies and New Energy Materials, Guangdong Provincial Key Laboratory of Optical Fiber Sensing and Communications, Department of Physics, Jinan University, Guangzhou 510632, China

<sup>c</sup> Institute of Polymer Optoelectronic Materials & Devices, State Key Laboratory of Luminescent Materials & Devices, South China University of Technology, Guangzhou 510640, China

\* Correspondence: qindh@scut.edu.cn (D.Q.); thlt@jnu.edu.cn (L.H.); Tel.: +86-020-8711-4346 (D.Q.); +86-020-8522-4386 (L.H.)

† These authors contributed equally to this work.

**Table S1.** The calculated HOMO and LUMO of the doped and undoped Cd<sub>33</sub>Te<sub>33</sub> nanocrystals.

| Configurations                      | HOMO (eV) | LUMO (eV) | HOMO-LUMO gap (eV) |
|-------------------------------------|-----------|-----------|--------------------|
| Cd <sub>33</sub> Te <sub>33</sub>   | -5.21     | -3.55     | 1.67               |
| Cu to Cd                            | -5.20     | -3.54     | 1.66               |
| Cd <sub>32</sub> CuTe <sub>33</sub> | -5.11     | -3.51     | 1.59               |

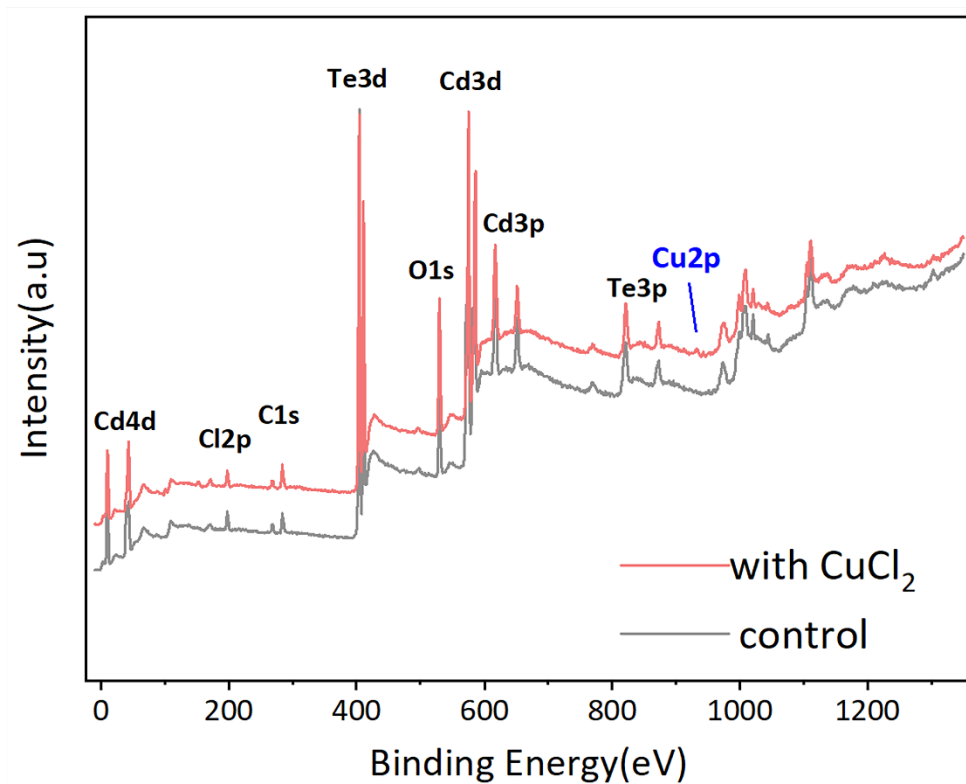

**Figure S1.** XPS full-scan spectra of CdTe NCs thin film w/ and w/o CuCl<sub>2</sub> doping.

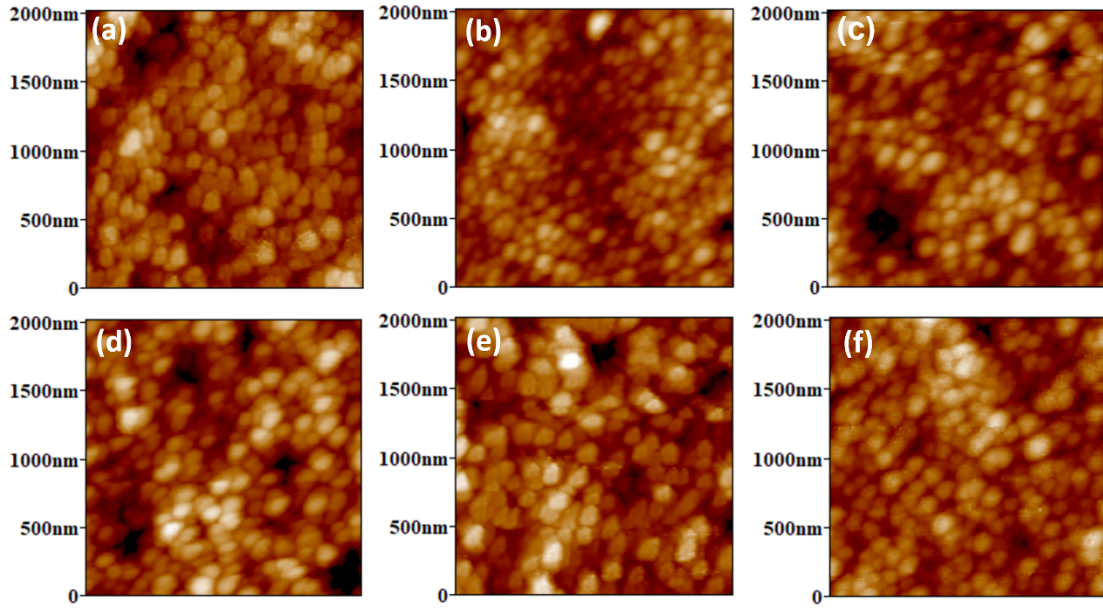

**Figure S2.** AFM images of CdTe with multiple copper salt doping at different concentration (a)  $3\mu\text{g/mL}$   $\text{CuBr}_2$ ; (b)  $6\mu\text{g/mL}$   $\text{CuBr}_2$ ; (c)  $9\mu\text{g/mL}$   $\text{CuBr}_2$ ; (d)  $12\mu\text{g/mL}$   $\text{CuBr}_2$ ; (e)  $5\mu\text{g/mL}$   $\text{CuSO}_4$ ; (f)  $6\mu\text{g/mL}$   $\text{Cu}(\text{NO}_3)_2$

**Table S2.** Summarized device performance with copper salt doping at different concentration

| Copper salt                | concentration      | PCE (%) | JSC ( $\text{mA cm}^{-2}$ ) | FF (%) | VOC (V) |
|----------------------------|--------------------|---------|-----------------------------|--------|---------|
| Control                    | $0\mu\text{g/mL}$  | 5.05    | 19.12                       | 52.82  | 0.50    |
| $\text{CuCl}_2$            | $2\mu\text{g/mL}$  | 5.88    | 22.06                       | 45.94  | 0.58    |
|                            | $4\mu\text{g/mL}$  | 6.30    | 20.20                       | 53.74  | 0.58    |
|                            | $6\mu\text{g/mL}$  | 6.06    | 22.80                       | 46.65  | 0.57    |
|                            | $8\mu\text{g/mL}$  | 5.58    | 20.16                       | 51.21  | 0.54    |
|                            | $10\mu\text{g/mL}$ | 4.91    | 16.53                       | 57.18  | 0.52    |
|                            | $1\text{mg/mL}$    | 3.89    | 15.47                       | 47.47  | 0.53    |
| $\text{CuBr}_2$            | $3\mu\text{g/mL}$  | 5.56    | 20.80                       | 51.47  | 0.52    |
|                            | $6\mu\text{g/mL}$  | 6.13    | 21.34                       | 49.49  | 0.58    |
|                            | $9\mu\text{g/mL}$  | 5.55    | 15.40                       | 59.07  | 0.61    |
|                            | $12\mu\text{g/mL}$ | 5.17    | 17.93                       | 52.43  | 0.55    |
| $\text{CuSO}_4$            | $5\mu\text{g/mL}$  | 5.63    | 20.46                       | 50.96  | 0.54    |
| $\text{Cu}(\text{NO}_3)_2$ | $6\mu\text{g/mL}$  | 5.85    | 17.85                       | 54.62  | 0.60    |

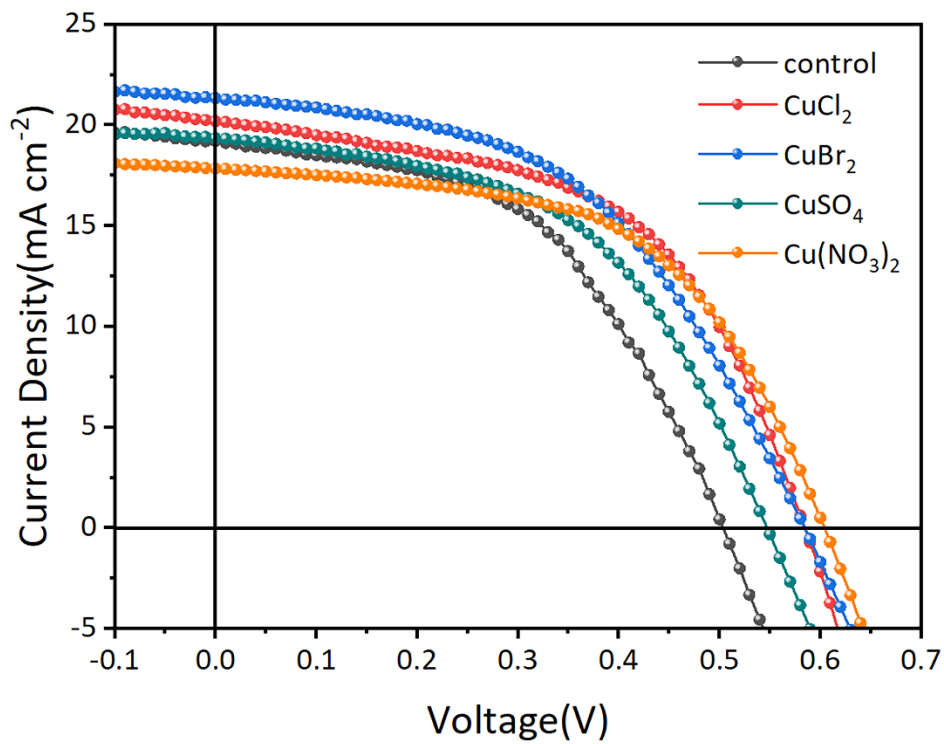

**Figure S3.** *J-V* characteristics of CdTe NCs solar cells with different copper salt doping

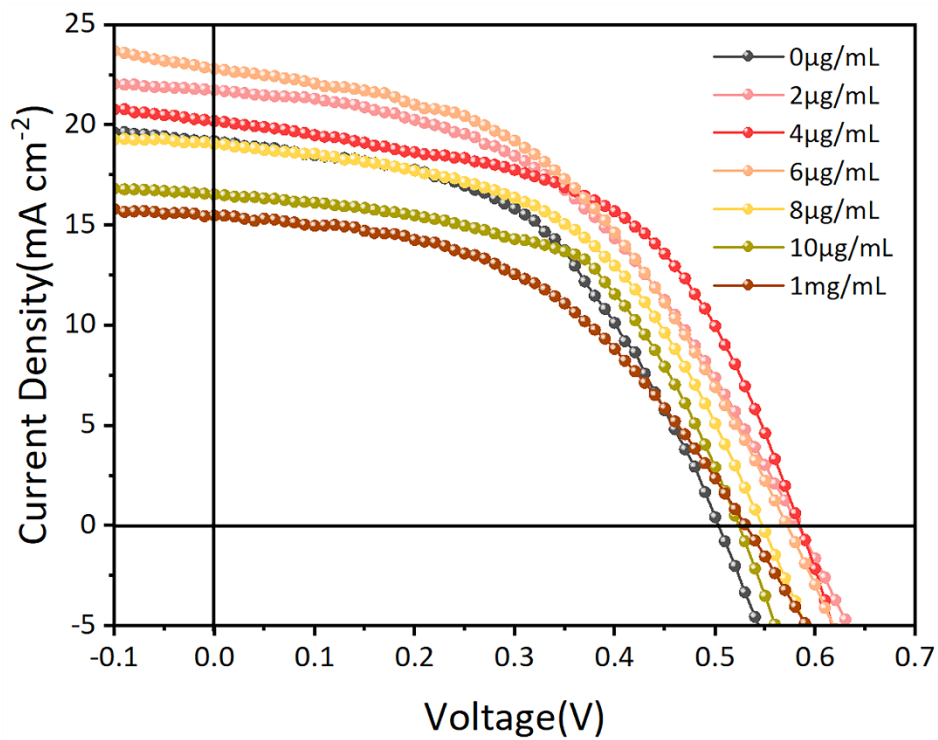

**Figure S4.** *J-V* characteristics of CdTe NCs solar cells with  $\text{CuCl}_2$  doping at different concentration.

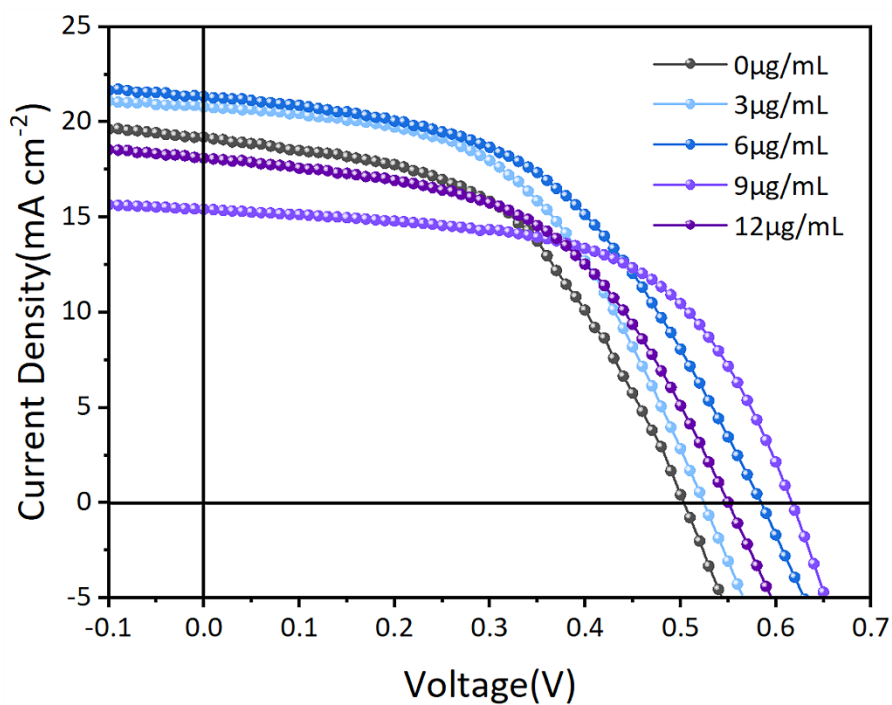

**Figure S5.**  $J$ - $V$  characteristics of CdTe NCs solar cells with  $\text{CuBr}_2$  doping at different concentration.

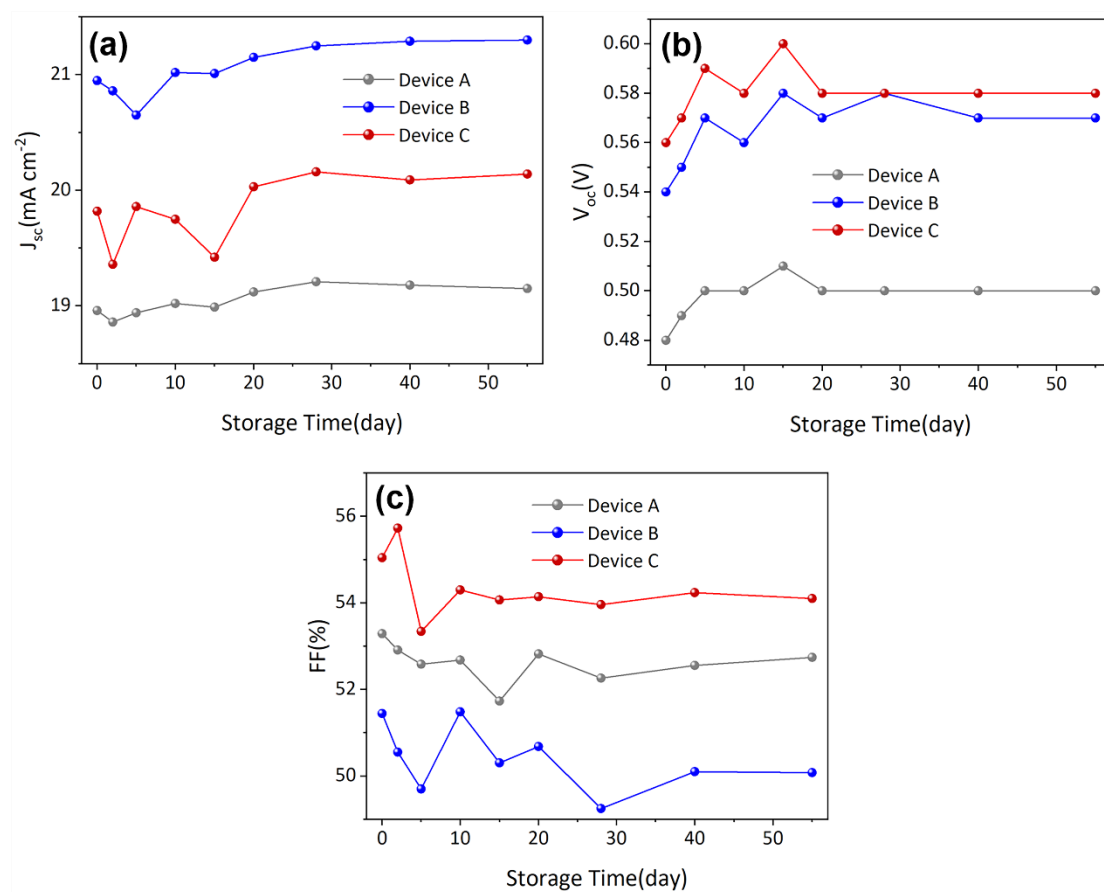

**Figure S6.** Stability of a)  $J_{sc}$ , b)  $V_{oc}$  and c) FF of CdTe NCs solar cells (Device A: control; Device B: with  $\text{CuBr}_2$  doping; Device C: with  $\text{CuCl}_2$  doping).

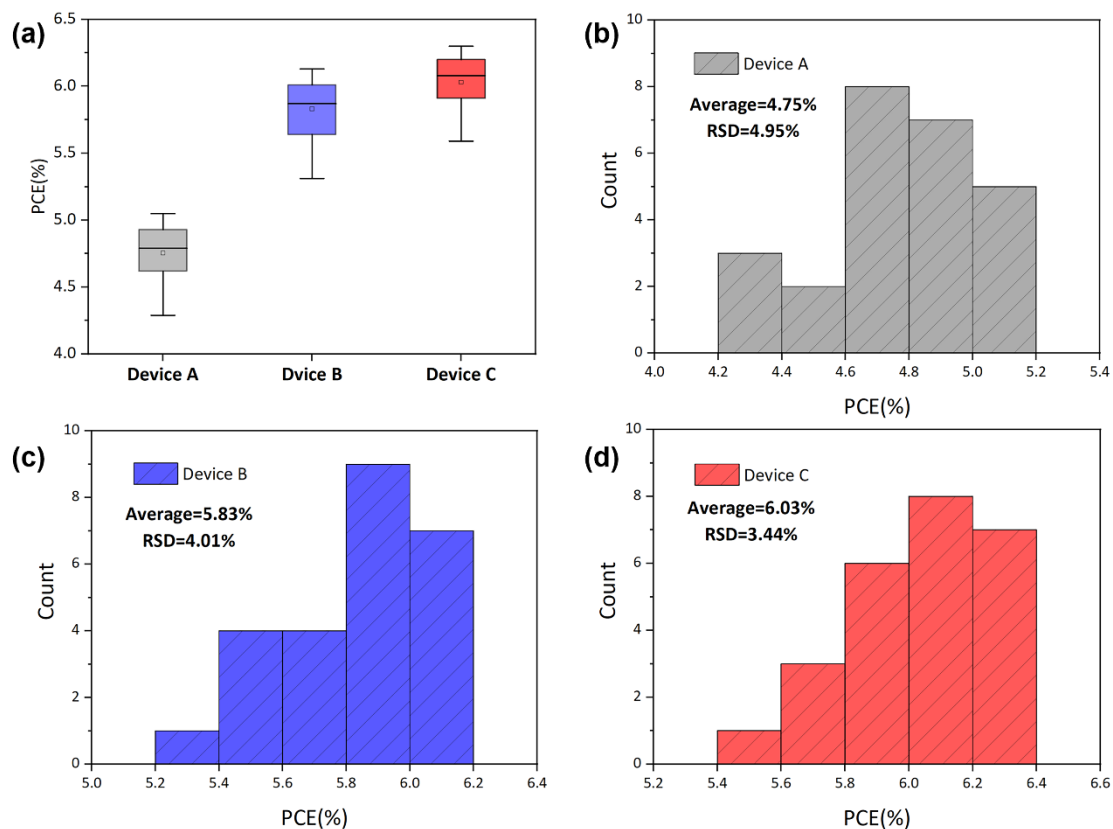

**Figure S7.** Statistical characterization: (a) Box diagram of repeatable device PCE; (b)~(d) PCE of distribution histogram of CdTe NCs solar cells (Device A: control; Device B: with CuBr<sub>2</sub> doping; Device C: with CuCl<sub>2</sub> doping; count of each device is 25).
